# Supplementary material
Source: ML conference proceedings conference paper supplement (https://openreview.net/forum?id=9SM6l0HyY_)
Supplement: supplementary_material [file attachment]

## A Experiment Details

### A.1 New Object Generalization

In Fig. 5, we show pictures of seen / unseen objects. For all the new object generalizations, we evaluate policies on multiple objects despite each policy being trained on a single object. Across tasks, we showcase the new objects that involve variations in color and geometry.

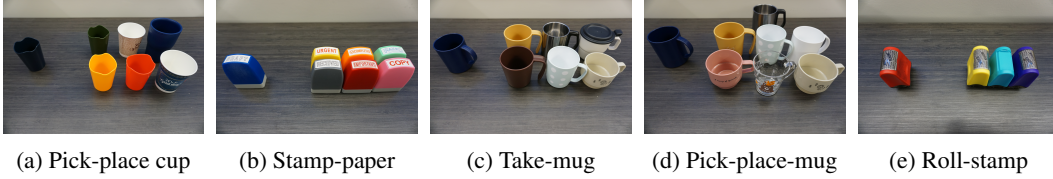

Figure 5: Overview of objects used in real-robot experiments. In each image, the single object on the **left** side is used during data collection, and **all** the objects on the right side are not seen during training. They are used for the evaluation of new object generalization in each task.

## B Additional Implementation Details

We describe all the details of our model implementation aside from the ones mentioned in main text.

### B.1 Model Details

**Neural Network Details.** We use a standard Transformer [21] architecture in our paper. We use 4 layers of transformer encoder layers, and 6 heads of the multi-head self-attention modules. For the two-layered fully connected networks, we use 1024 hidden units for each layer. For GMM output head, we choose the number of modes for the Gaussian Mixture Model to be 5, which is the same as in Mandelkar et al. [1].

**Temporal Positional Encoding.** For computing temporal positional encoding, we follow the equation for each dimension  $i$  in the encoding vector at a temporal position  $pos$ :

$$PE(pos, 2i) = \sin\left(\frac{pos}{10^{2i/D}}\right)$$

$$PE(pos, 2i + 1) = \cos\left(\frac{pos}{10^{(2i+1)/D}}\right)$$

We choose the frequency of positional encoding to be 10 which is different from the one in the original transformer paper. This is because our input sequence is much shorter than those in natural language tasks, hence we choose a smaller value to have sufficiently distinguishable positional features for input tokens.

**Training Details** For point masking, we use a masking ratio of 0.6 in simulation, and 0.75 for real world. Because of the limited field-of-view, the occlusion of objects in simulation is severe. To properly evaluate policies in simulation, we add an eye-in-hand camera that only captures close-distance depth (the depth observation is clipped to the range of gripper tips). This design choice allows the policies to learn while preventing policies from relying entirely on eye-in-hand cameras.

In all our experiments of GROOT, we train for 100 epochs. We use a batch size of 16 and a learning rate of  $10^{-4}$ . We use negative log-likelihood as the loss function for action supervision loss since we use a GMM output head. As we notice that validation loss doesn't correlate with policy performance [1], we adopt a pragmatic way of saving model checkpoint as in Zhu et al. [3], which is to save the checkpoint that has the lowest loss over all the demonstration data at the end of training. We apply a gradient clip at 100 across all the experiments to prevent training from gradient explosion.

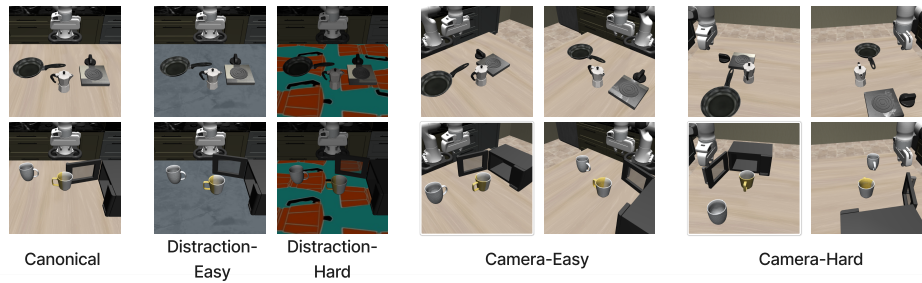

Figure 6: Screenshots of simulation tasks, for both Canonical, Background (Easy), Background (Hard), Camera (Easy), Camera (Hard)

## C Environment Details

Here we describe more about our environment designs.

**Baseline Implementations** As we mainly focus on comparing the effectiveness of representations, all the transformer-based baselines (VIOLA and MAE-POLICY) use the same architecture for a fair comparison. Since none of the baselines were proposed for learning with RGB-D observations, we implemented them with minimal changes to accommodate the RGB-D observations. For BC-RNN, we encode depth images with an additional resnet encoder, and concatenate the features along with the other features as inputs to the RNN backbone. For VIOLA, we extract the task-agnostic proposals and back project each proposal into point clouds, giving VIOLA a fair comparison with our approach. As for MAE-POLICY, we patchify both RGB and depth images and pass the unmasked patches into the transformer architecture.

**Generalization Settings in Simulation** Fig. 6 shows the initial conditions of simulation tasks. Note that “Put the moka pot on the stove” and “Put the frying pan on the stove” share the same initial distributions, so we only visualize one of the tasks for showing the initialization settings. Background (Hard) is the hard level as we changed both the lighting conditions, and add the table cloth that has object patterns. Camera (Hard) is harder than Camera (Easy), as the cameras are rotated with 40 more degrees. Such a wild change in camera viewpoints results in a very different perspective on objects. Challenges the generalization abilities of policies.

**Real-Robot Setup** We use a 7-DoF Franka Emika Panda arm in all tasks. For real robot end-effector control, we use the Operational Space Controller [58] implemented from Deoxys [3]. The controller operates at 20Hz alongside a binary gripper control. We use Intel Realsense D435i as the workspace camera.

**Success Conditions of Real-Robot Task** To quantify the policy performance, we explain the success conditions for all the tasks as follows:

- “Pick Place Cup”: The cup is placed on the coaster upright.
- “Stamp The Paper”: The robot stamps on the paper and put the stamp back to the table
- “Take The Mug”: The mug is taken from the coaster, and placed on the table steadily.
- “Put the Mug On The Coaster”: The mug is put on the coaster steadily.
- “Roll the Stamp”: The robot successfully rolls the stamp for half of the paper length.

**Data Collection** We use a 3Dconnexion SpaceMouse to collect 50 human-teleoperated demonstrations for every real-world task. As for simulation, the simulation environments directly provide 50 high-quality teleoperated demonstrations, so we directly leverage them for policy learning.



542 **Evaluation Horizons** For policy evaluation, we limit the decision horizons to 600 timesteps.
